# Supplementary material
Source: PubMed Central journal article supplement (PMC7407684)
Supplement: ajtr0012-3953-f5.pdf [file ajtr0012-3953-f5.pdf]

## circMAGI3 accelerates the glycolysis of NSCLC

**Table S1.** Sequences of shRNA and qRT-PCR primers

|                | 5'-3'                                                                         |
|----------------|-------------------------------------------------------------------------------|
| circMAGI3      | forward, 5'-CGACATCTGTCAGCAAGATGGA-3'<br>reverse, 5'-CTTGCTGCAGTTTGTGGTCA-3'  |
| sh-circMAGI3-1 | 5'-ACGCAGGCAAAGTCATTAATA-3'                                                   |
| sh-circMAGI3-2 | 5'-GGCAGTGGAAACGCAGGCAAA-3'                                                   |
| sh-circMAGI3-3 | 5'-GTGGAAACGCAGGCAAAGTCA-3'                                                   |
| miR-515-5p     | forward, 5'-CGGGTTCTCCAAAAGAAAGCA-3'<br>reverse, 5'-CAGCCACAAAAGAGCACAAT-3'   |
| HDGF           | forward, 5'-CTCTCCCTTACGAGGAATCCA-3'<br>reverse, 5'-CCTTGACAGTAGGGTTGTTCTC-3' |
| U6             | forward, 5'-CTCGCTTCGGCAGCACA-3'<br>reverse, 5'-AACGCTTCACGAATTTGCGT-3'       |
| beta-actin     | forward, 5'-CTCCTTAATGTCACGCAGGATTC-3'<br>reverse, 5'-GTGGGGCGCCCAGGCACCA-3'  |
